# Supplementary material for: Processing of Fluorescent Proteins May Prevent Detection of Prion Particles in [PSI+] Cells
Source: Biology (Basel). 2022 Nov 22;11(12):1688. doi: 10.3390/biology11121688 (PMC9774836; doi:10.3390/biology11121688)
Supplement: Supplementary file 1 [file biology-11-01688-s001.zip]

Archive with 10 entries (10 files):
- Fig. S3-Original Images of Fig3A.tif
- Fig. S4-Original Images of Fig3B(1).tif
- Fig. S5-Original Images of Fig3B(2).tif
- Fig. S6-Original Images of Fig4-[Alexa Fluor 488].tif
- Fig. S7-Original Images of Fig4-[Cy3].tif
- Fig. S8-Original Images of Fig5B.tif
- Fig. S9-Original Images of Fig6B.tif
- Supplementary_Figs S1,S2.pdf
- Supplementary_Table_S1.xlsx
- Supplementary_Table_S2.xlsx
