# Supplementary material for: Processing of Fluorescent Proteins May Prevent Detection of Prion Particles in [PSI+] Cells
Source: Biology (Basel). 2022 Nov 22;11(12):1688. doi: 10.3390/biology11121688 (PMC9774836; doi:10.3390/biology11121688)
Supplement: Supplementary file 1 [file biology-11-01688-s001.zip › Supplementary_Table_S1.xlsx]

## Sheet: Лист1
Plasmid	Selectable marker	Promoter	Gene	Reference
pRS315	LEU2	-	-	[30]
pRS316	URA3	-	-	[30]
pRS315CNMG	LEU2	CUP1	SUP35NM-GFP	[25]
pRS316CNMG	URA3	CUP1	SUP35NM-GFP	[24]
pRS315CG	LEU2	CUP1	GFP	[25]
pRS316CG	URA3	CUP1	GFP	[24]
pRS315CNMmC	LEU2	CUP1	SUP35NM-mCherry	This work
pRS315CmC	LEU2	CUP1	mCherry	This work
pR16CUP-NM-yTagRFP-T	URA3	CUP1	SUP35NM-yTagRFP-T	[25]
pIM35	URA3	MET17	yTagRFP-T	[27]
pR15CUP-NM-yTagRFP-T	LEU2	CUP1	SUP35NM-yTagRFP-T	This work
pR15CUP-yTagRFP-T	LEU2	CUP1	yTagRFP-T	This work
YCplac33-SIS1	URA3	SIS1	SIS1	This work
pRS315CUP-NM-M0-GFP	LEU2	CUP1	SUP35NM-M0-GFP	[25]
pRS315CUP-sup35-240-GFP	LEU2	CUP1	sup35-240-GFP	[31]
pU-SFP1-GFP	URA3	CUP1	SFP1-GFP	[32]
pAG415ADH1-Sis1-EGFP	LEU2	ADH1	SIS1-EGFP	[26]
