# Supplementary material for: Processing of Fluorescent Proteins May Prevent Detection of Prion Particles in [PSI+] Cells
Source: Biology (Basel). 2022 Nov 22;11(12):1688. doi: 10.3390/biology11121688 (PMC9774836; doi:10.3390/biology11121688)
Supplement: Supplementary file 1 [file biology-11-01688-s001.zip › Supplementary_Table_S2.xlsx]

## Sheet: Table S1 Cell counts
strain	construct	diffuse fluorescence	1-3 foci	multiple foci	multiple small foci + 1-3 big foci	total cells analyzed	% of cells with visible aggregates	p-value in Fisher's test	clones analyzed
OT56	NM-GFP	15	67	1	50	133	88.72		3
OT56	NM-mCherry	112	0	28	0	140	20	<2,20E-16	5
P1-U-1A-D1628	NM-GFP	121	106	110	44	381	68.24		5
P1-U-1A-D1628	NM-mCherry	123	4	4	0	131	6.11	<2,20E-16	4
3.1P.1-1B-D1606	NM-GFP	1	0	9	18	28	96.43		1
3.1P.1-1B-D1606	NM-mCherry	16	0	8	0	24	33.33	9.54e-07	1
Ψ1-33G-D373	NM-GFP	0	2	6	4	12	100		2
Ψ1-33G-D373	NM-mCherry	33	0	3	0	36	8.33	6.53e-09	2
P-2V-P3982	NM-GFP	13	15	5	32	65	80		3
P-2V-P3982	NM-mCherry	33	12	23	2	70	52.86	0.001054	3
U-T-PT-YAL2171	NM-GFP	10	12	8	21	51	80.39		2
U-T-PT-YAL2171	NM-mCherry	232	11	35	0	278	16.55	<2,20E-16	3
1107-5V-H19	NM-GFP	62	4	16	0	82	24.39		2
1107-5V-H19	NM-mCherry	236	0	11	3	250	5.6	7.16e-06	6
